# Supplementary material for: Three-parameter-based streamflow elasticity model: application to MOPEXbasins in the USA at annual and seasonal scales
Source: Copernicus journal article supplement (doi:10.5194/hess-20-2545-2016), 2016-07-01
Supplement: Supplementary file 1 [file hess-20-2545-2016-supplement.zip]

Archive with 3 entries (3 files):
- supfig2.png
- supfig1.png
- hess-20-2545-2016-supplement-title-page.pdf
