# Supplementary material for: Three-parameter-based streamflow elasticity model: application to MOPEXbasins in the USA at annual and seasonal scales
Source: Copernicus journal article supplement (doi:10.5194/hess-20-2545-2016), 2016-07-01
Supplement: Supplementary file 1 [file hess-20-2545-2016-supplement.zip › hess-20-2545-2016-supplement-title-page.pdf]

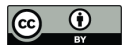

## *Supplement of*

# **Three-parameter-based streamflow elasticity model: application to MOPEX basins in the USA at annual and seasonal scales**

**Goutam Konapala and Ashok K. Mishra**

*Correspondence to:* Ashok K. Mishra (ashokm@g.clemson.edu)

- hess-20-2545-2016-supplement-title-page.pdf
- supfig1.png
- supfig2.png

The copyright of individual parts of the supplement might differ from the CC-BY 3.0 licence.
