# Supplementary figures and images for: Three-parameter-based streamflow elasticity model: application to MOPEXbasins in the USA at annual and seasonal scales
Source: Copernicus journal article supplement (doi:10.5194/hess-20-2545-2016), 2016-07-01

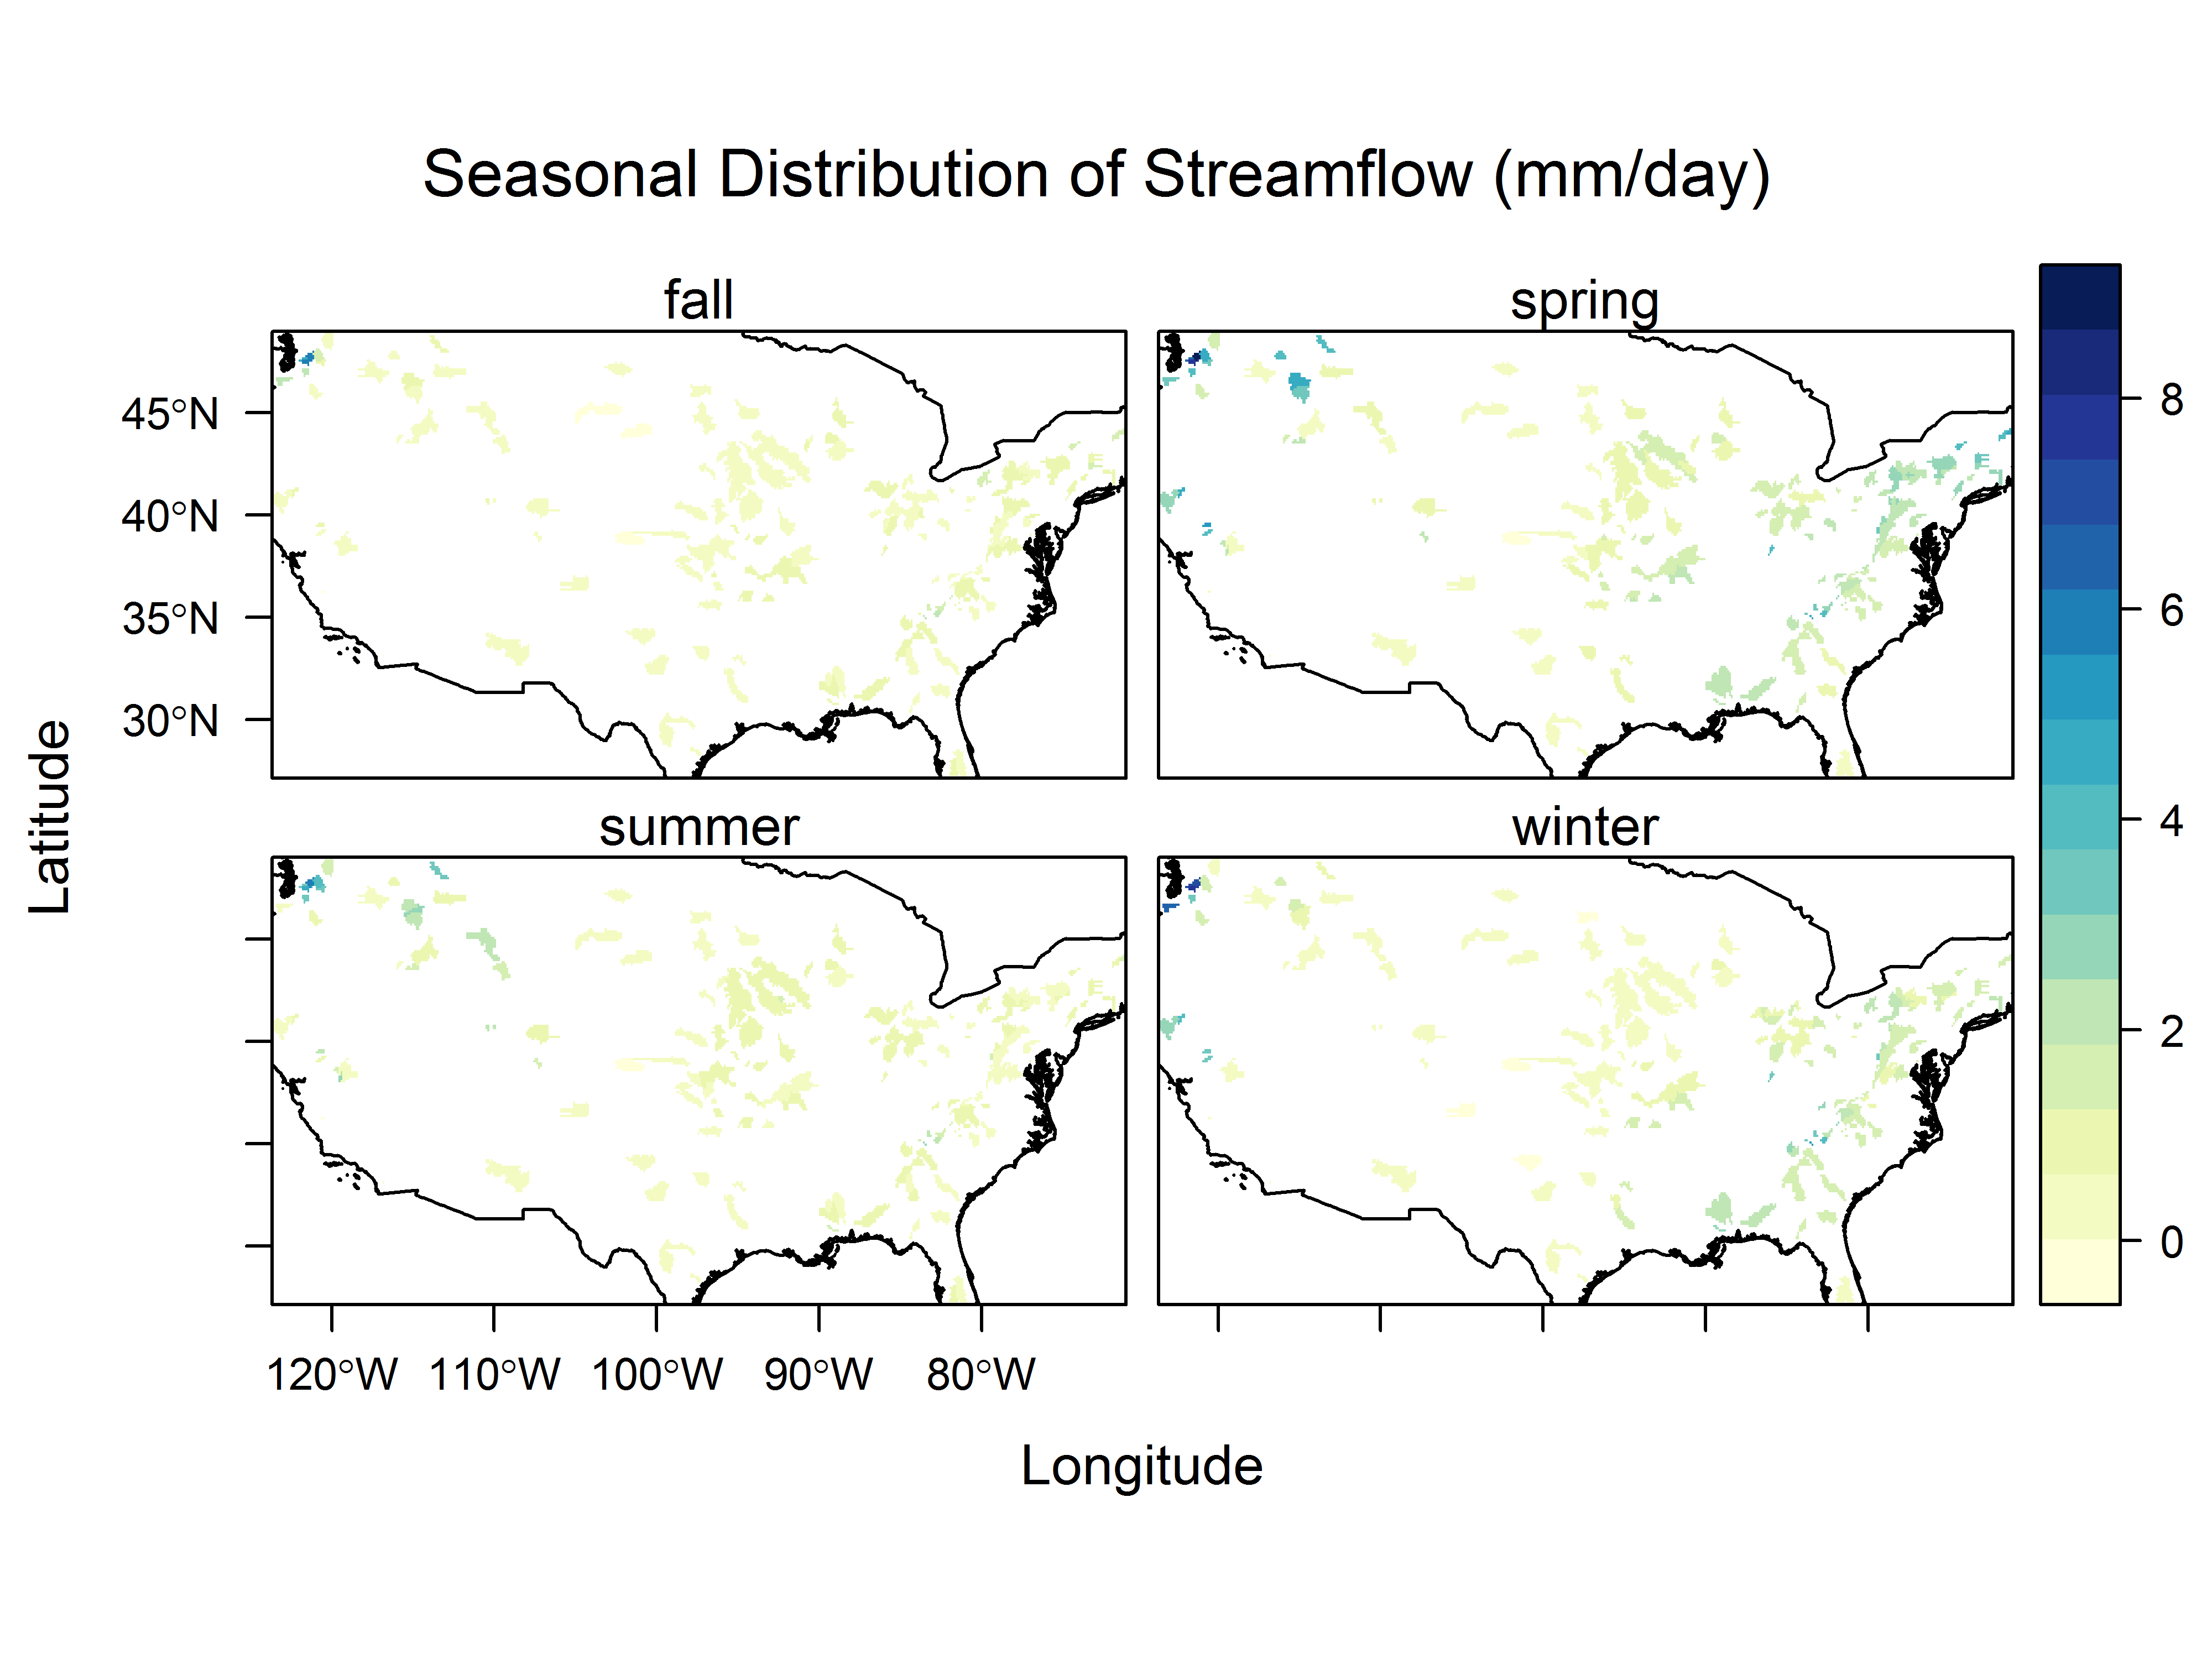

Supplement: Supplementary file 1 [file hess-20-2545-2016-supplement.zip › supfig2.png]

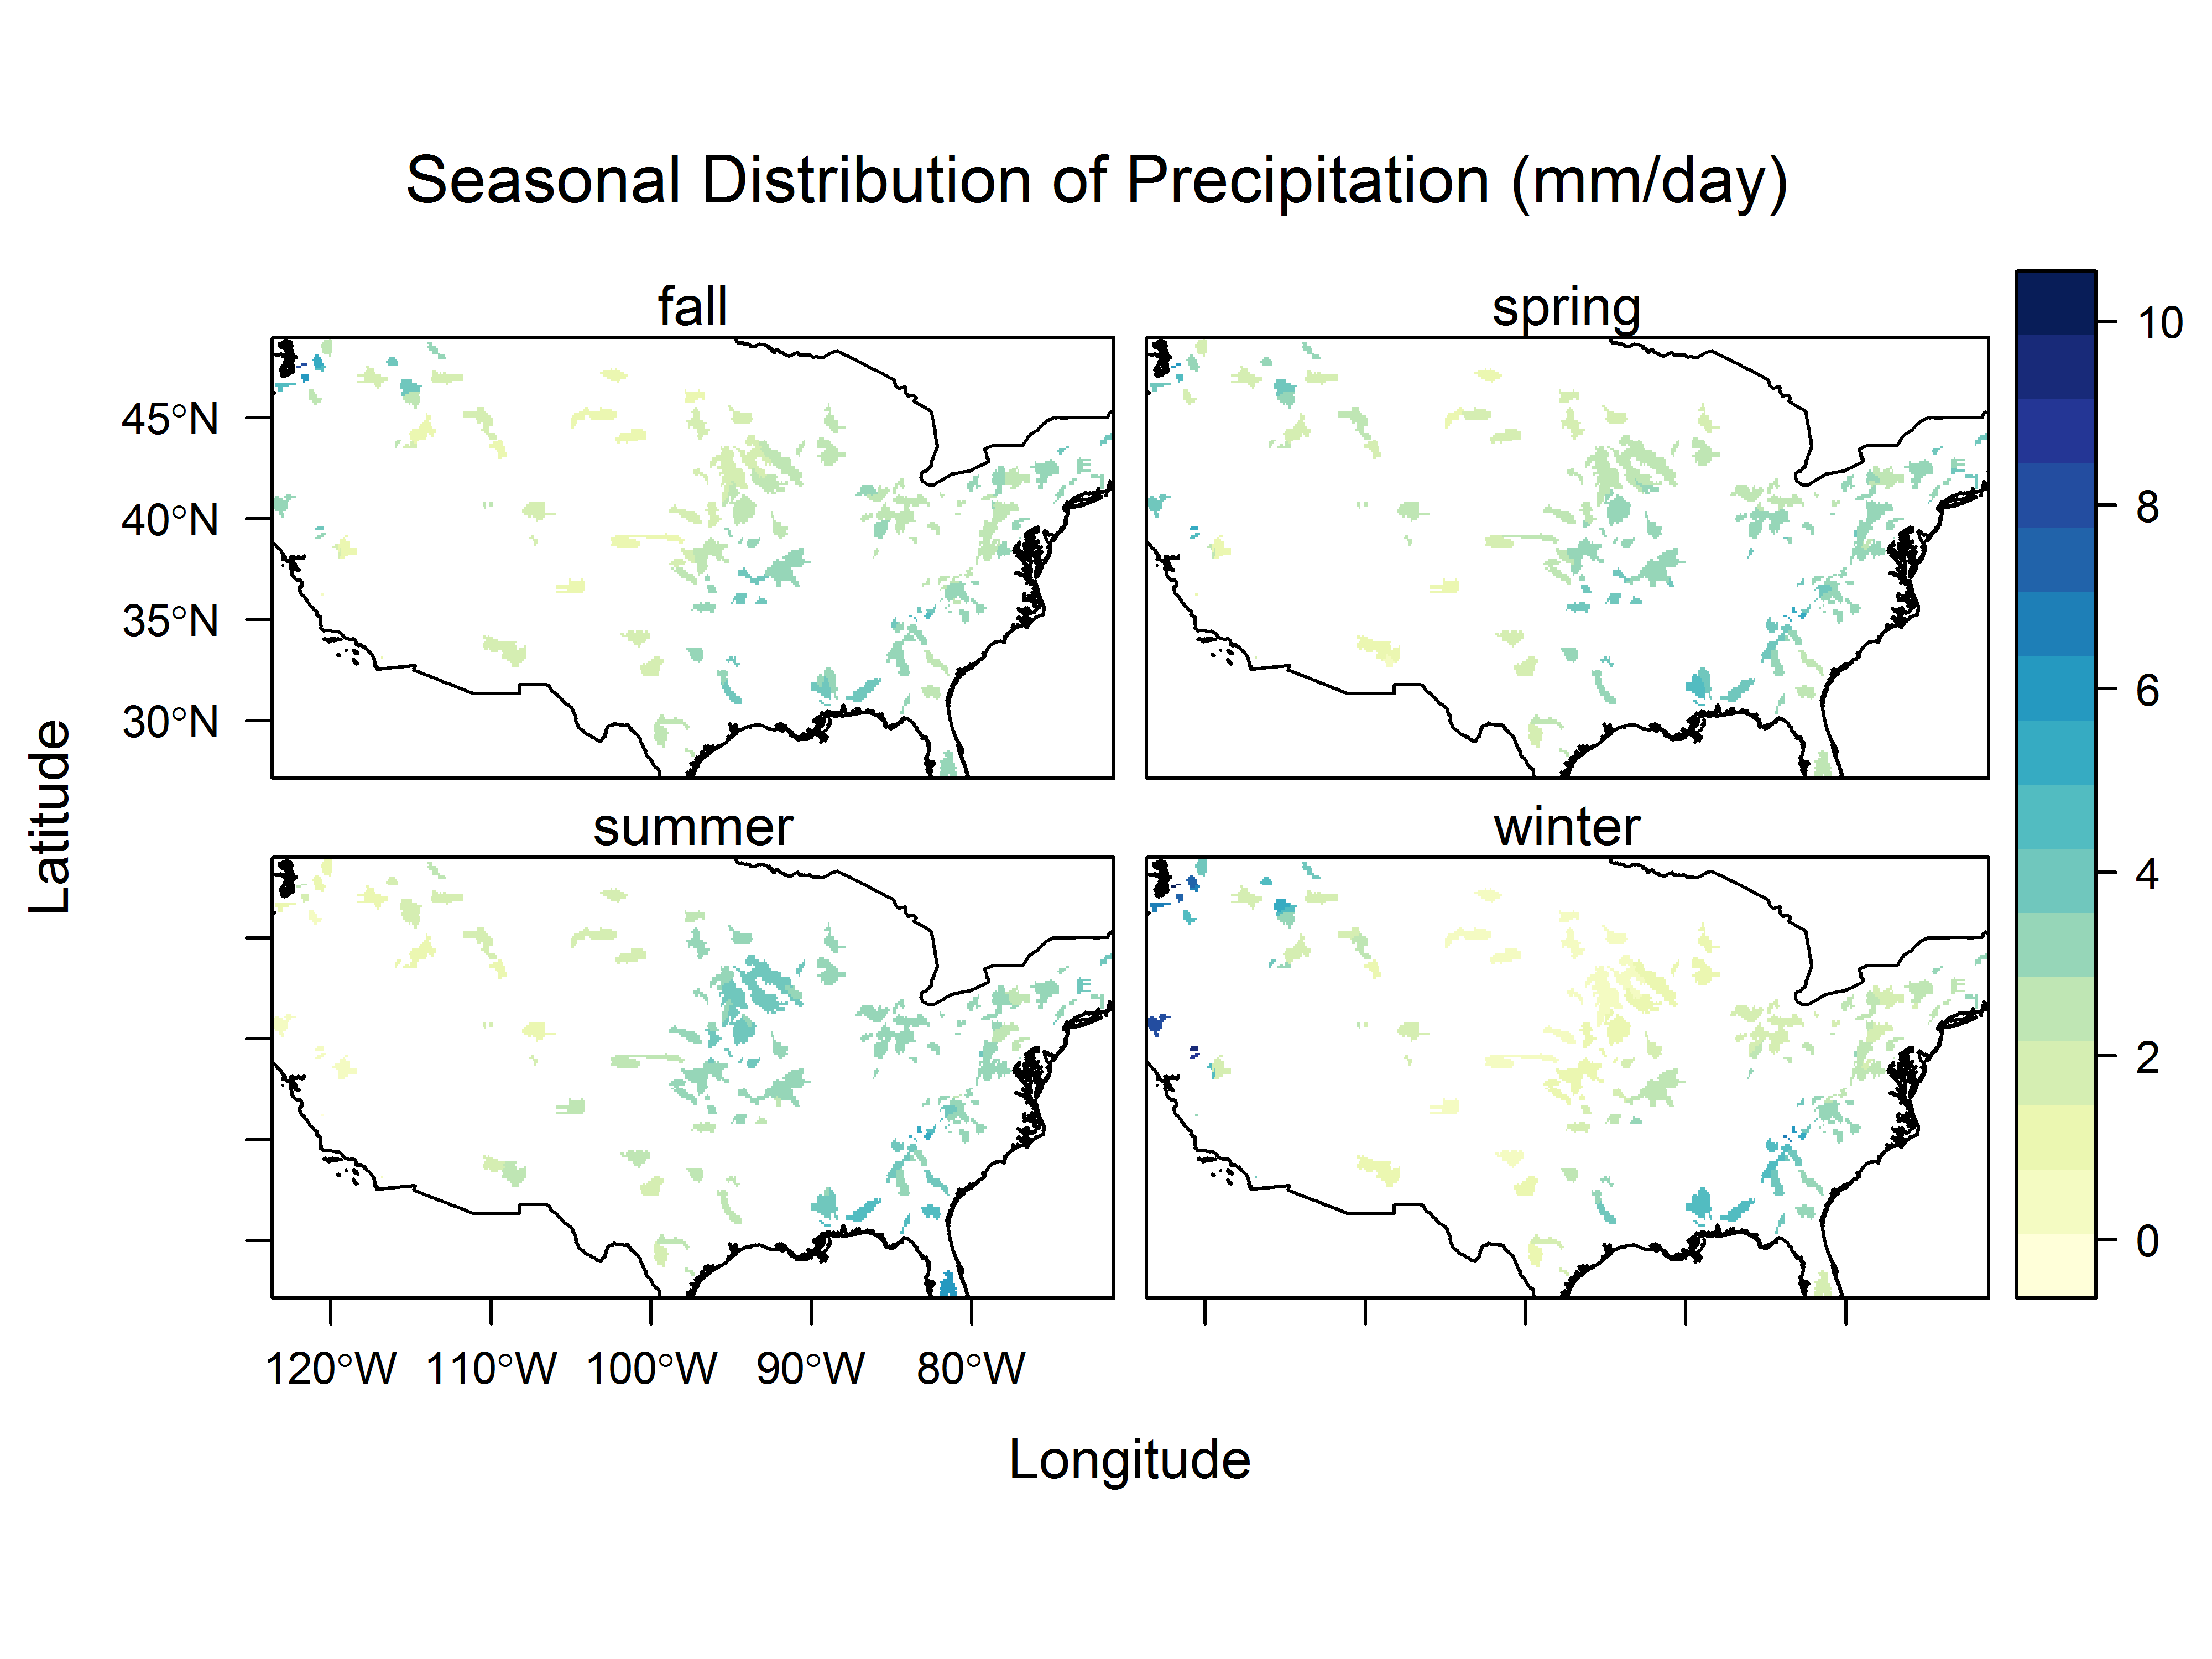

Supplement: Supplementary file 1 [file hess-20-2545-2016-supplement.zip › supfig1.png]
